# Supplementary material for: In silico DFT and molecular modeling of novel pyrazine-bearing thiazolidinone hybrids derivatives: elucidating in vitro anti-cancer and urease inhibitors
Source: publisher site journal article supplement (doi:10.1515/znc-2024-0103), 2024-10-01
Supplement: Supplementary file 1 [file j_znc-2024-0103_suppl_001.docx]

***Supplementary Information***

**………………………………………………………………………………………………………**

**S.1. Spectral Analysis**

**S..1 (Z)-3-(5-chloropyrazin-2-yl)-2-(p-tolylimino)thiazolidin-4-one (1)**

Color, White solid, Yield; 67%, Melting Point; 198-199 °C, Rf = 0.76 (*n*-hexane:EthAc 7:3); 1H-NMR (600 MHz, DMSO-*d6*): δ 8.32 (s, 1H, Pyrazin-H), 8.24 (s, 1H, Pyrazin-H) , 7.67 (d, *J* = 9.5 Hz, 2H, Ar-H), 7.62 (d, *J* = 9.3 Hz, 2H, Ar-H), 4.35 (s, 2H, S-CH2), 2.45 (s, 3H, Ar-CH3); 13C-NMR (150 MHz, DMSO-*d6*): *δ* 189.7, 170.5, 164.9, 164.5, 164.4, 160.2, 159.9, 144.6, 138.8, 137.4, 137.2, 128.7, 39.7, 27.3; HREI-MS: m/z calcld for C14H11N4OSCl, [M]+ 318.1076, Found 318.1037.

**S.1.2 (Z)-3-(5-chloropyrazin-2-yl)-2-((3,4-dimethylphenyl)imino)thiazolidin-4-one (2)**

Color, White solid, Yield; 60%, Melting Point; 204-205 °C, Rf = 0.76 (*n*-hexane:EthAc 7:3); 1H-NMR (600 MHz, DMSO-*d6*): δ 8.34 (s, 1H, Pyrazin-H), 8.21 (s, 1H, Pyrazin-H) , 7.72 (d, *J* = 9.0 Hz, 1H, Ar-H), 7.61 (s 1H, Ar-H), 7.57 (d, *J* = 9.4 Hz, 1H, Ar-H), 4.37 (s, 2H, S-CH2), 2.49 (s, 3H, Ar-CH3), 2.46 (s, 3H, Ar-CH3); 13C-NMR (150 MHz, DMSO-*d6*): *δ* 190.6, 173.5, 162.8, 162.5, 162.4, 160.2, 160.0, 151.6, 150.8, 150.4, 139.8, 139.6, 138.7, 41.3, 23.9; HREI-MS: m/z calcld for C15H13N4OSCl, [M]+ 332.1872, Found 332.1821.

**S.1.3 (Z)-3-(5-chloropyrazin-2-yl)-2-((4-(trifluoromethyl)phenyl)imino)thiazolidin-4-one (3)**

Color, light-green solid, Yield; 75%, Melting Point; 208-209 °C, Rf = 0.56 (*n*-hexane:EthAc 7:3); 1H-NMR (600 MHz, DMSO-*d6*): δ 8.30 (s, 1H, Pyrazin-H), 8.25 (s, 1H, Pyrazin-H) , 7.82 (d, *J* = 8.9 Hz, 2H, Ar-H), 7.69 (d, *J* = 9.2 Hz, 2H, Ar-H), 4.34 (s, 2H, S-CH2); 13C-NMR (150 MHz, DMSO-*d6*): *δ* 188.6, 172.6, 159.9, 159.3, 158.4, 158.2, 158.0, 149.6, 148.8, 148.4, 147.8, 146.6, 129.5, 120 39.7; HREI-MS: m/z calcld for C14H8N4OSClF3, [M]+ 372.2452, Found 372.2407.

**S.1.4 (Z)-2-((4-chloro-3-methylphenyl)imino)-3-(5-chloropyrazin-2-yl)thiazolidin-4-one (4)**

Color, Yellow solid, Yield; 69%, Melting Point; 221-222 °C, Rf = 0.71 (*n*-hexane:EthAc 7:3); 1H-NMR (600 MHz, DMSO-*d6*): δ 8.36 (s, 1H, Pyrazin-H), 8.27 (s, 1H, Pyrazin-H) , 7.71 (d, *J* = 9.2 Hz, 1H, Ar-H), 7.63 (s 1H, Ar-H), 7.37 (d, *J* = 8.8 Hz, 1H, Ar-H), 4.41 (s, 2H, S-CH2), 2.42 (s, 3H, Ar-CH3); 13C-NMR (150 MHz, DMSO-*d6*): *δ* 192.8, 173.5, 159.8, 159.3, 158.4, 158.3, 157.9, 157.6, 147.8, 147.4, 146.8, 146.6, 42.7, 27.5; HREI-MS: m/z calcld for C14H10N4OSCl2, [M]+ 353.1348, Found 353.1323.

**S.1.5 (Z)-2-((4-chloro-2-methylphenyl)imino)-3-(5-chloropyrazin-2-yl)thiazolidin-4-one (5)**

Color, light-yellow solid, Yield; 68%, Melting Point; 219-220 °C, Rf = 0.70 (*n*-hexane:EthAc 7:3); 1H-NMR (600 MHz, DMSO-*d6*): δ 8.40 (s, 1H, Pyrazin-H), 8.26 (s, 1H, Pyrazin-H) , 7.68 (d, *J* = 9.0 Hz, 1H, Ar-H), 7.62 (s 1H, Ar-H), 7.41 (d, *J* = 8.9 Hz, 1H, Ar-H), 4.39 (s, 2H, S-CH2), 2.40 (s, 3H, Ar-CH3); 13C-NMR (150 MHz, DMSO-*d6*): *δ* 185.6, 167.5, 160.9, 160.3, 159.4, 159.2, 148.9, 146.6, 145.8, 139.4, 139.0, 138.5, 41.6, 29.7; HREI-MS: m/z calcld for C14H10N4OSCl2, [M]+ 353.5638, Found 353.5612.

**S.1.6 (Z)-3-(5-chloropyrazin-2-yl)-2-((3-(trifluoromethyl)phenyl)imino)thiazolidin-4-one (6)**

Color, light-green solid, Yield; 81 %, Melting Point; 212-213 °C, Rf = 0.72 (*n*-hexane:EthAc 7:3); 1H-NMR (600 MHz, DMSO-*d6*): δ 8.39 (s, 1H, Pyrazin-H), 8.20 (s, 1H, Pyrazin-H) , 7.68 (dd, *J* = 8.5, 1.6 Hz, 1H, Ar-H), 7.59 (s 1H, Ar-H), 7.43 (dd, *J* = 8.0, 1.9 Hz, 1H, Ar-H), 7.29 (t, *J* = 8.6 Hz, 1H, Ar-H), 4.42 (s, 2H, S-CH2); 13C-NMR (150 MHz, DMSO-*d6*): *δ* 187.4, 171.3, 165.8, 164.9, 164.7, 162.1, 161.9, 153.6, 147.8, 147.3, 131.5, 131.3, 128.7, 39.7; HREI-MS: m/z calcld for C14H8N4OSClF3, [M]+ 372.5842, Found 372.5822.

**S.1.7 (Z)-3-(5-chloropyrazin-2-yl)-2-((4-fluoro-2-hydroxyphenyl)imino)thiazolidin-4-one(7)**

Color, White solid, Yield; 63 %, Melting Point; 215-216 °C, Rf = 0.63 (*n*-hexane:EthAc 7:3); 1H-NMR (600 MHz, DMSO-*d6*): δ 10.06 (s, 1H, Ar-OH), 8.43 (s, 1H, Pyrazin-H), 8.27 (s, 1H, Pyrazin-H) , 7.83 (d, *J* = 8.5 Hz, 1H, Ar-H), 7.72 (d, *J* = 8.0 Hz, 1H, Ar-H), 7.54 (s, 1H, Ar-H), 4.45 (s, 2H, S-CH2); 13C-NMR (150 MHz, DMSO-*d6*): *δ* 188.9, 178.3, 171.4, 171.2, 170.8, 167.1, 166.4, 159.4, 155.3, 155.0, 145.4, 143.8, 43.7; HREI-MS: m/z calcld for C13H8N4O2SClF, [M]+ 338.7883, Found 338.7829.

**S.1.8 (Z)-3-(5-chloropyrazin-2-yl)-2-(naphthalen-1-ylimino)thiazolidin-4-one (8)**

Color, White solid, Yield; 61 %, Melting Point; 228-229 °C, Rf = 0.73 (*n*-hexane:EthAc 7:3); 1H-NMR (600 MHz, DMSO-*d6*): δ 8.56 (dd, 1H, *J* = 9.0, 2.5 Hz, Naphthalene-H), 8.44 (s, 1H, Pyrazin-H), 8.31 (s, 1H, Pyrazin-H), 8.28 (dd, *J* = 8.7, 1.9 Hz, 1H, Naphthalene-H), 8.23 (t, *J* = 8.6 Hz, 1H, Naphthalene-H), 8.13 (dd, *J* = 8.0, 2.2 Hz, 1H, Naphthalene-H), 8.04 (dd, *J* = 9.0, 2.8 Hz, 1H, Naphthalene-H), 7.97 (t, 1H, *J* = 8.4, 2.5 Hz, Naphthalene-H), 7.83 (t, 1H, *J* = 8.7, 2.0 Hz, Naphthalene-H), 4.51 (s, 2H, S-CH2); 13C-NMR (150 MHz, DMSO-*d6*): *δ* 188.8, 173.4, 161.7, 160.9, 160.5, 157.6, 156.8, 148.8, 146.8, 144.4, 144.0, 143.8, 142.1, 140.3, 139.4, 138.6, 43.0; HREI-MS: m/z calcld for C17H11N4OSCl, [M]+ 354.1886, Found 354.1832.

**S.1.9 (Z)-3-(5-chloropyrazin-2-yl)-2-((4-phenoxyphenyl)imino)thiazolidin-4-one (9)**

Color, White solid, Yield; 67 %, Melting Point; 216-217 °C, Rf = 0.71 (*n*-hexane:EthAc 7:3); 1H-NMR (600 MHz, DMSO-*d6*): δ 8.52 (s, 1H, Pyrazin-H), 8.43 (s, 1H, Pyrazin-H), 8.30 (d, 2H, *J* = 8.5 Hz, Phenoxyphenol-H), 8.26 (d, *J* = 8.0 Hz, 2H, Phenoxyphenol-H), 8.23 (t, *J* = 7.9 Hz, 2H, Phenoxyphenol-H), 8.17 (m, *J* = 8.4 Hz, 1H, Phenoxyphenol-H), 8.13 (dd, *J* = 7.9, 2.3 Hz, 2H, Phenoxyphenol-H) 4.53 (s, 2H, S-CH2); 13C-NMR (150 MHz, DMSO-*d6*): *δ* 181.9, 177.2, 163.9, 162.3, 162.0, 159.2, 159.0, 157.4, 151.5, 151.3, 147.8, 147.5, 143.2, 142.3, 140.5, 132.4, 131.5, 128.5, 41.9; HREI-MS: m/z calcld for C19H13N4O2SCl, [M]+ 396.5681, Found 396.5630.

**S.1.10 (Z)-2-((3-chloro-4-fluorophenyl)imino)-3-(5-chloropyrazin-2-yl)thiazolidin-4-one (10)**

Color, Yellow solid, Yield; 63%, Melting Point; 221-222 °C, Rf = 0.66 (*n*-hexane:EthAc 7:3); 1H-NMR (600 MHz, DMSO-*d6*): δ 8.37 (s, 1H, Pyrazin-H), 8.31 (s, 1H, Pyrazin-H) , 8.20 (s, 1H, Ar-H), 7.92 (d,*J* = 8.2 Hz, 1H, Ar-H),7.79 (d,*J* = 8.8 Hz, 1H, Ar-H), 4.44 (s, 2H, S-CH2); 13C-NMR (150 MHz, DMSO-*d6*): *δ* 187.6, 173.1, 167.9, 167.3, 167.0, 166.8, 164.9, 162.9, 154.3, 147.5, 147.3, 137.9, 40.3; HREI-MS: m/z calcld for C13H7N4OSFCl2, [M]+ 357.7854, Found 357.7824.

**S.1.11 (Z)-2-((3-bromo-4-chlorophenyl)imino)-3-(5-chloropyrazin-2-yl)thiazolidin-4-one (11)**

Color, White solid, Yield; 79 %, Melting Point; 237-238 °C, Rf = 0.71 (*n*-hexane:EthAc 7:3); 1H-NMR (600 MHz, DMSO-*d6*): δ 8.39 (s, 1H, Pyrazin-H), 8.30 (s, 1H, Pyrazin-H) , 8.08 (d, *J* = 8.9 Hz, 1H, Ar-H), 7.92 (s 1H, Ar-H), 7.81 (d, *J* = 8.8 Hz, 1H, Ar-H), 4.37 (s, 2H, S-CH2); 13C-NMR (150 MHz, DMSO-*d6*): *δ* 183.7, 175.8, 166.8, 166.3, 166.0, 162.6, 162.0, 156.4, 153.0, 147.4, 146.8, 136.8, 41.7; HREI-MS: m/z calcld for C13H7N4OSCl2Br, [M]+ 418.1634, Found 418.1607.

**S.1.12 (Z)-2-((2-bromo-4-chlorophenyl)imino)-3-(5-chloropyrazin-2-yl)thiazolidin-4-one (12)**

Color, brown solid, Yield; 60%, Melting Point; 234-235 °C, Rf = 0.70 (*n*-hexane:EthAc 7:3); 1H-NMR (600 MHz, DMSO-*d6*): δ 8.34 (s, 1H, Pyrazin-H), 8.26 (s, 1H, Pyrazin-H) , 810 (d, *J* = 8.7 Hz, 1H, Ar-H), 7.99 (s 1H, Ar-H), 7.87 (d, *J* = 8.9 Hz, 1H, Ar-H), 4.37 (s, 2H, S-CH2); 13C-NMR (150 MHz, DMSO-*d6*): *δ* 181.8, 173.4, 162.7, 162.3, 161.7, 158.4, 158.6, 139.6, 138.3, 131.4, 130.4, 128.7, 39.2; HREI-MS: m/z calcld for C13H7N4OSCl2Br, [M]+ 418.1634, Found 418.1607.

**S.1.13 (Z)-3-(5-chloropyrazin-2-yl)-2-((4-(dimethylamino)phenyl)imino)thiazolidin-4-one (13)**

Color, Yellow solid, Yield; 63 %, Melting Point; 227-228 °C, Rf = 0.72 (*n*-hexane:EthAc 7:3); 1H-NMR (600 MHz, DMSO-*d6*): δ 8.33 (s, 1H, Pyrazin-H), 8.27 (s, 1H, Pyrazin-H) , 7.89 (d, *J* = 8.7 Hz, 2H, Ar-H), 7.63 (d, *J* = 9.0 Hz, 2H, Ar-H), 4.36 (s, 2H, S-CH2), 3.21 (s, 6H, N(CH3)2); 13C-NMR (150 MHz, DMSO-*d6*): *δ* 188.8, 171.6, 161.7, 160.3, 160.4, 158.6, 157.4, 149.4, 148.8, 148.7, 147.8, 147.5, 52.7, 52.6, 38.5; HREI-MS: m/z calcld for C15H14N5OSCl, [M]+ 347.4258, Found 347.4207.

**S.2 Statistical Analysis**

All of the measurements were taken in triplicate, and Microsoft Excel 2003 was used

to conduct the statistical analysis. The results are shown as standard error means (SEM).

**S.3 Urease inhibitory assay**

Spectrophotometrically urease inhibition assay was performed. For urease inhibition assay 5 μL of synthetic compound was incubated with 25 μL of urease solution (1 U/well) (250 μL) at 30 °C for 15 min. After that, 55 μL substrate urea with 100 mM concentration was added and the plate was again incubated at 30 °C. After incubation 70 μL of basic reagent (0.5% w/v NaOH and 0.1% NaOCl) and 45 μL of carbolic acid (1% w/v carbolic acid and 0.005% w/v Na2[Fe(CN)5NO]) were added at each well. Again, plate was incubated for 50 min at 30 °C. Rate of production ammonia was used for determining urease inhibitory activity by following Weather burn method and change in absorbance was monitored at 630 nm on a ELISA plate reader (Spectra Max M2, Molecular Devices, CA, USA) [1]. All assays were performed in triplicate.

**S.4 Molecular Docking Protocol**

Molecular docking was studied using MOE software to understand the binding mode of synthesized compounds against both the targeted enzymes in order to triangulate in vitro and in silico results well. The crystal structures of both targets were retrieved from the RCSB protein databank using the PDB codes 1ACL for AChE and 1P0P for BuChE. Using the default MOE-Dock module parameters, the crystallographic structures and all synthesized compounds were protonated and energy was minimized, resulting in optimized enzyme and compound structures. After that, the optimized enzyme and compound structures were used in a docking study. Comprehensive details of the docking protocol are included in our previous investigations [2,3].

**Anti-Cancer**

MTT Cytotoxicity Assay. The cytotoxicity activities on the human liver carcinoma (HepG2), human breast adenocarcinoma (MCF-7), human colorectal carcinoma (HCT-116), and human lung carcinoma (A549) cell lines were estimated employing the 3-(4,5-dimethyl-2-thiazolyl)-2,5- diphenyl-2H-tetrazolium bromide (MTT) assay, which was grounded on the reduction of the tetrazolium salt by mitochondrial dehydrogenases in viable cells.[4,5]The cells were dispensed in a 96-well sterile microplate (3 × 104 cells/ well), followed by their incubation at 37 °C with a series of different concentrations of 10 μL of each compound or doxorubicin (positive control, in DMSO) for 48 h in a serumfree medium prior to the MTT assay. Subsequently, the media were carefully removed, and 40 μL of MTT (2.5 mg/mL) was added to each well and then incubated for an additional 4 h. Purple formazan dye crystals were solubilized by the addition of 200 μL of DMSO. The absorbance was measured at 570 nm using a SpectraMax Paradigm Multi-Mode microplate reader. The relative cell viability was expressed as the mean percentage of viable cells relative to the untreated control cells. All experiments were conducted in triplicate and were repeated on three different days. All of the values were represented as mean ± standard deviation (SD). The IC50s were determined by the SPSS probit analysis software program (SPSS Inc., Chicago, IL).

**References**

1. M.W. Weatherburn, Phenol-hypochlorite reaction for determination of ammonia, Anal. Chem. 39 (1967) 971.

2. Wadood, A.; Shareef, A.; Rehman, A.U.; Muhammad, S.; Khurshid, B.; Khan, R.S.; Shams, S.; Afridi, S.G. In Silico Drug Designing for ala438 Deleted Ribosomal Protein S1 (RpsA) on the Basis of the Active Compound Zrl15. ACS Omega 2022, 7, 397–408.[CrossRef]

3. Rehman, A.U.; Zhen, G.; Zhong, B.; Ni, D.; Li, J.; Nasir, A.; Gabr, M.T.; Rafiq, H.; Wadood, A.; Lu, S.; et al. Mechanism of zinc ejection by disulfiram in nonstructural protein 5A. Phys. Chem. Chem. Phys. 2021, 23, 12204–12215. [CrossRef]

4. Alminderej, H. F. M.; Elganzory, H. H.; El-Bayaa, M. N.; Awad, H. M.; El-Sayed, W. A. Synthesis and Cytotoxic Activity of New 1,3,4- Thiadiazole Thioglycosides and 1,2,3-Triazolyl-1,3,4-Thiadiazole Nglycosides. Molecules 2019, 24, No. 3738.

5. Haiba, M. E.; Al-Abdullah, E. S.; Ahmed, N. S.; Ghabbour, H. A.; Awad, H. M. Efficient and easy synthesis of new Benzo[h]- chromene and Benzo[h]quinoline derivatives as a new class of cytotoxic agents. J. Mol. Struct. 2019, 1195, 702−711.
